# Supplementary material
Source: PubMed Central journal article supplement (PMC2701883)

Milestone 1 Report for

**Schering AG**

**Gpx5 KO (SHG0013)**

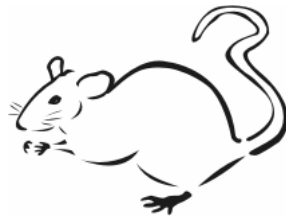

## Summary

|                      |                                 |
|----------------------|---------------------------------|
| Customer             | Schering AG                     |
| Project              | Gpx5 KO                         |
| Description          | Conditional KO of the GPX5 Gene |
| Official Start Date  | 2005-07-18                      |
| Official Finish Date | 2005-08-21                      |
| Issue Date           | 2005-09-02                      |

## Table of Contents

|                             |   |
|-----------------------------|---|
| Schering AG                 | 1 |
| Summary                     | 2 |
| Table of Contents           | 2 |
| Overview Targeting Strategy | 3 |
| Final Targeting Vector      | 4 |
| Vector Sequence             | 5 |

## Overview Targeting Strategy

### Conventional / Conditional KO of GPX5

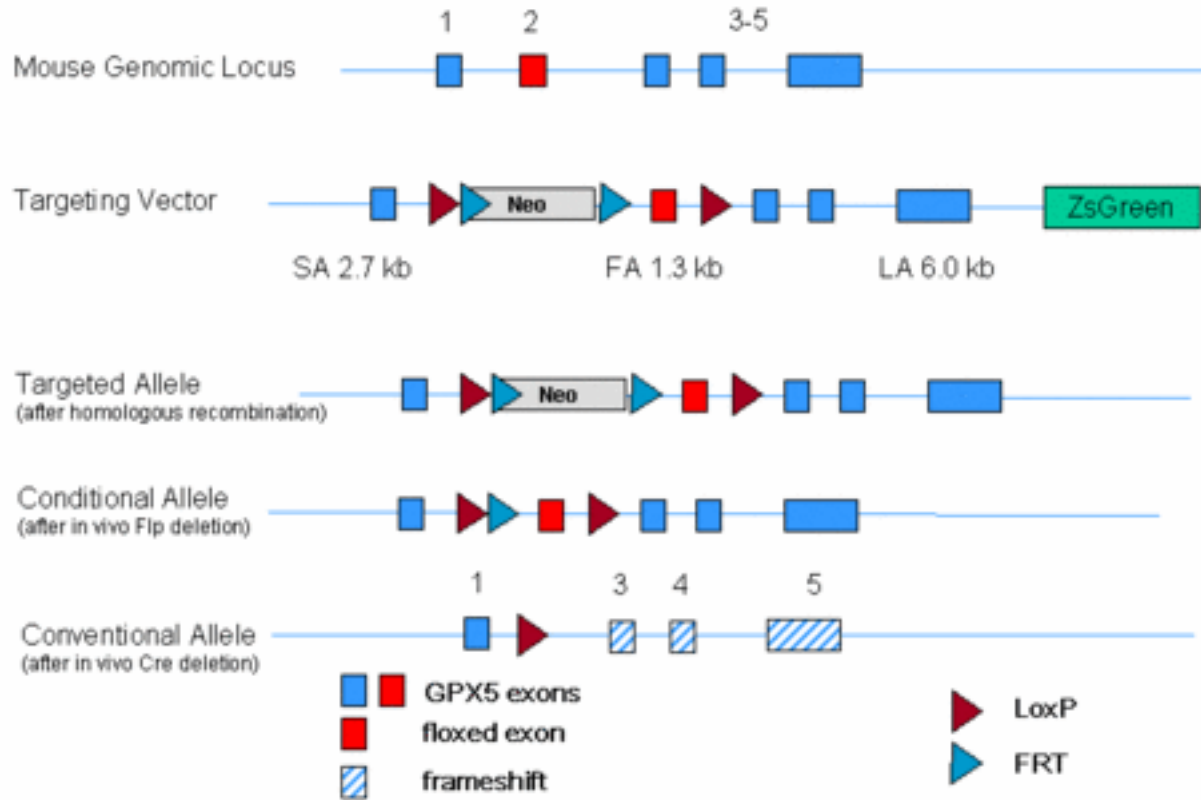

- Conditional Targeting strategy as previously agreed on
- Deletion of exons 2 results in null allele by generating a frame shift
- FRT flanked selection marker, allows in vivo deletion of selection marker
- Targeting strategy allows to generate conditional and constitutive KO in parallel
- Generation of targeting vector with C57BL/6J BAC DNA

## Final Targeting Vector

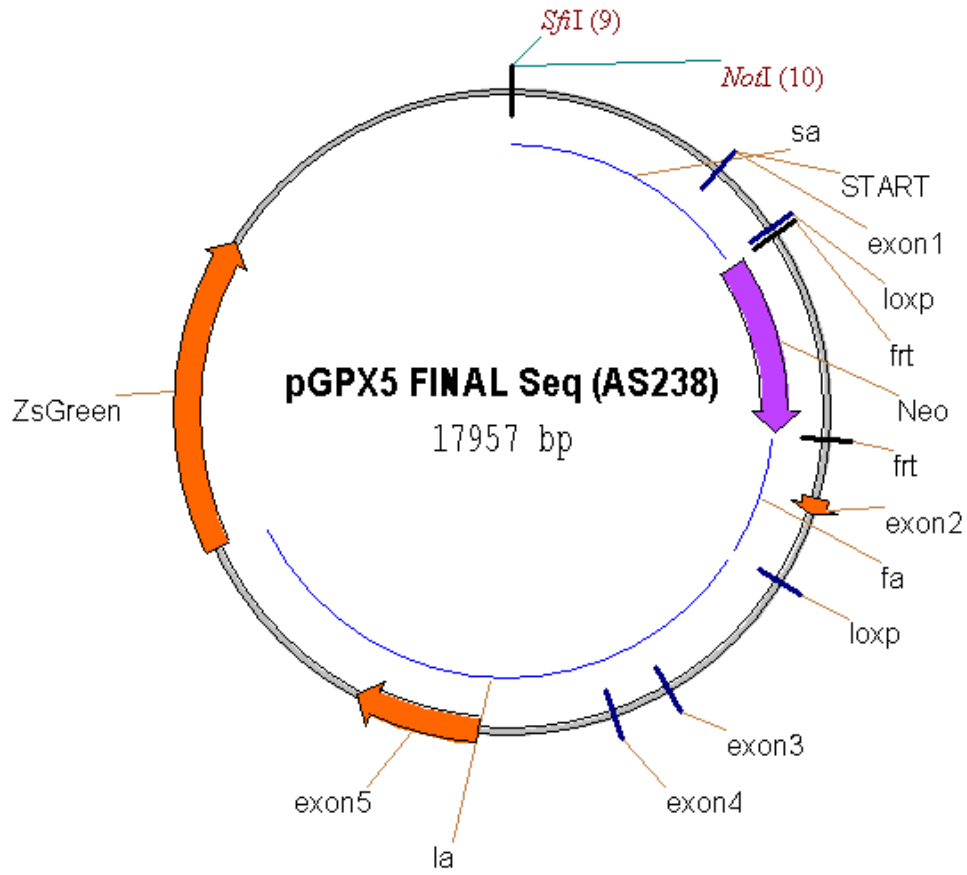

## Vector Sequence

| BASE COUNT | 4527 a      | 4229 c     | 4546 g     | 4655 t      | 0 n         |             |
|------------|-------------|------------|------------|-------------|-------------|-------------|
| ORIGIN     |             |            |            |             |             |             |
| 1          | ggccatagcg  | gccgcttaaa | agagtatctc | acattgctgg  | tgacgcactc  | ctgtaagctc  |
| 61         | agaatttgag  | aagtggaaac | agaaagagtt | caaggctatc  | cttgggtaca  | gaaaaactta  |
| 121        | attcaacctg  | gactacacaa | gctcttgtct | caaaaataaa  | aaaaaaaaaa  | gatgttcaat  |
| 181        | atccttaggc  | attagagaaa | caaaaataga | cactatcata  | agattccagt  | tcatctcaaa  |
| 241        | caaaggctcg  | acaccagcaa | tgccagcaaa | gatgggggaa  | agaggacgtc  | tgattggccc  |
| 301        | gttgtgaagt  | aacctagtgc | agccactatg | aaactcagga  | tggaggattc  | tcaaaatcga  |
| 361        | aaatccttga  | agaaccaagc | tctacctcag | agctacttta  | cctatgtttg  | ttgcaaggat  |
| 421        | tgagcccaga  | ttaggtgccc | attaacaaac | atagagagaa  | agaaaatgtg  | gtacatacac  |
| 481        | ataatggaat  | tttattcaac | cataaagaaa | aataaaattg  | tggcatagaa  | atgaatgata  |
| 541        | ctagaaatta  | ctatgttaag | ccaaataacc | cagattggaa  | aagacaaatg  | ccatattcct  |
| 601        | tctttcatat  | ggatcctagg | tttttatttc | tatatatgca  | catacgtgta  | tgaagggtta  |
| 661        | atataggtca  | tgaaaataga | aaggggatca | tgagaggaag  | aaaaagaggt  | tttaagtaaa  |
| 721        | cgggagagat  | taaagtgggt | aatagaatac | tcacatcatg  | aaggctcacac | gggggctagt  |
| 781        | gagcaggaag  | tagggagagg | ggggcgggga | ggagcatcaa  | gaaacacacc  | agtgccttat  |
| 841        | atgctaattt  | taaaccacca | caaattaatt | agttcaaaaa  | atagaaagca  | ctgcattcag  |
| 901        | agtagccacc  | caaagagttg | acaatgttca | gctttctcca  | tccccgcct   | actgtgtgca  |
| 961        | agaacacagt  | tgccagacta | caccagggct | gagtcccacc  | agtcctctta  | actcctgcca  |
| 1021       | atctgataaa  | cacggatgta | tcttttctta | ttcataattc  | ttgattattg  | ttgagagaga  |
| 1081       | acattgtatc  | ctaccacaga | taccactggc | tttcatgagt  | tgtgcccatt  | tctcccttta  |
| 1141       | tcagatTTTT  | aaaaaattac | tgatttataa | gttcttgaaa  | gcatttctat  | aaatgagcat  |
| 1201       | atcaatgtgt  | tgtagtttat | tctcaattcc | tgccccactc  | cccccccca   | agttctcttg  |
| 1261       | aacagattat  | aggtagctct | atccttcagg | gctttttaaa  | ttttattttt  | tgaggtttta  |
| 1321       | ttttatttat  | tgattgtgtg | tgtgtgtgtg | tgtgtgtgtg  | tgtgtgtgtg  | tgtgtgtgtg  |
| 1381       | tatacacata  | tgtgcacatg | tgtatgtggg | taccagaaa   | ggatagaaga  | aggcttgagg  |
| 1441       | ttccctaaag  | ctgaagttgc | tggtagtgtg | gagccaccag  | atgtagggtg  | tgggagccaa  |
| 1501       | gctcgattcc  | cttgtgagac | cagcaagcac | tgttagcact  | aagccattct  | ccagcttcta  |
| 1561       | ccctttgggg  | ttttatttta | agctaaaata | ataagcagtc  | ttctgttac   | tgcccaacc   |
| 1621       | tacgcagtat  | agcagcatac | atgaactaca | tatcttgagc  | catataaaca  | gtatttcgaa  |
| 1681       | catccgtgtc  | aactgttata | caaggaagtt | tgtcttatct  | ctcaacattt  | acattcaagg  |
| 1741       | gcttgccaca  | actgtctgat | aattctgata | aatcctgata  | aagttcagga  | ttcatatgag  |
| 1801       | ttccagggcc  | taccacact  | attgaattcg | gagtgtctcg  | gggggctgtg  | gtaggcaaga  |
| 1861       | atatgacttc  | aattctctag | gtttgctgga | caagaatact  | tactgcctcg  | tgattggtct  |
| 1921       | taataggtgt  | gggctggtct | ttttcaaggt | atcaaacac   | tggagagatg  | agcaaagact  |
| 1981       | gcaggccctc  | agaccagaaa | tcggcagtac | tagtcatggt  | tacagagtta  | agagtcttct  |
| 2041       | atcttgttcc  | acttcttcta | gccagctatg | tgacagacaac | ccccaggccg  | gaaaagatga  |
| 2101       | aggtgagtaa  | ggtccagaga | gagctcagca | gggctgaaca  | cagtcacctt  | tgtcccttcg  |
| 2161       | gtcttgggaag | agcctcgctt | tagtgttctt | ctctgggtgg  | caccttgaac  | ctttcttctc  |
| 2221       | ttcttctgtg  | agcttccctt | tcataaatag | gagttgttga  | gttgcatacg  | gataaggagg  |
| 2281       | aaagagttca  | ctaacaatta | tcctttctcc | actgcttccc  | caagtggatg  | ccccccacat  |
| 2341       | gccatactag  | atgagagcag | atctgttgac | cacagtcatc  | aagtaggtag  | ggactggggg  |
| 2401       | ttggaggagt  | tgactaatca | cagaacgaat | gatgaacgaa  | ggaagggctt  | gttgtaaaaa  |
| 2461       | aaaaaaaaaa  | agagctaata | tggattttta | agaataaaag  | aactcatggg  | gaaaaacaat  |
| 2521       | aaccagaatc  | ctaaaagcaa | ttaggtttgg | agtgatgggt  | gtctgagaat  | ctagtcttag  |
| 2581       | ctctgctctc  | agtttgagc  | tcagctgttt | tatcgacaac  | tgagctatct  | gtgtagcagt  |
| 2641       | agaaagggca  | atccacagga | ggatagaaac | acagaagagg  | ggacactaga  | cacaatcaaa  |
| 2701       | tattcactca  | gagtgcccta | ggataacttc | gtataatgta  | tgctatacga  | agttatggta  |
| 2761       | accgaagttc  | ctatactttc | tagagaatag | gaacttcgga  | ataggaactt  | cttataatct  |
| 2821       | agaactagtg  | gatccacgat | tcgagggccc | ctgcaggtca  | attctaccgg  | gtagggggagg |
| 2881       | cgcttttccc  | aaggcagctc | ggagcatgcg | ctttagcagc  | cccgtggggc  | acttggcgct  |
| 2941       | acacaagtgg  | cctctggcct | cgcacacatt | ccacatccac  | cggtaggcgc  | caaccggctc  |
| 3001       | cgttctttgg  | tggccccttc | gcccacctt  | ctactcctcc  | cctagtcagg  | aagttcccc   |
| 3061       | cgccccgca   | gctcgcgtcg | tgaggacgt  | gacaaatgga  | agtagcacgt  | ctcactagtc  |
| 3121       | tcgtgcagat  | ggacagcacc | gctgagcaat | ggaagcgggt  | aggcctttgg  | ggcagcggcc  |

3181 aatagcagct ttgctccttc gctttctggg ctacagaggct gggaaaggggt gggtcggggg  
 3241 gcgggctcag gggcgggctc aggggcgggg cgggcgcccg aaggctcctc ggaggcccgg  
 3301 cattctgcac gcttcaaaaag cgcacgtctg ccgcgctggt ctctctctcc tcatctccgg  
 3361 gcctttcagc ctgcagccaa tatgggatcg gccattgaac aagatggatt gcacgcaggt  
 3421 tctccggccg cttgggtgga gaggctattc ggctatgact gggcacaaca gacaatcggc  
 3481 tgctctgatg ccgcccgtgtt ccggctgtca gcgcaggggc gcccggttct tttgtcaag  
 3541 accgacctgt ccggtgccct gaatgaactg caggacgagg cagcgcggct atcgtggctg  
 3601 gccacgacgg gcgttccttg cgcagctgtg ctgcagcttg tcaactgaagc gggaaagggac  
 3661 tggctgctat tgggcgaagt gccggggcag gatctcctgt catctcacct tgctcctgcc  
 3721 gagaaagtat ccatcatggc tgatgcaatg cggcggtgctc atacgcttga tccggctacc  
 3781 tgccattcag accaccaagc gaaacatcgc atcgcgcgag cacgtactcg gatggaagcc  
 3841 ggtcttgctg atcaggatga tctggacgaa gagcatcagg ggctcgcgcc agccgaactg  
 3901 ttcgccaggc tcaaggcgcg catgcccagc ggcgaggatc tcgctgtgac ccatggcgat  
 3961 gcctgcttgc cgaatatcat ggtggaaaat ggcgctttt ctggattcat cgaactgtggc  
 4021 cggctgggtg tggcgaccg ctatcaggac atagcgttgg ctaccgctga tattgctgaa  
 4081 gagcttggcg gcgaatgggc tgaccgcttc ctgctgcttt acggtatcgc cgctcccgat  
 4141 tcgcagcgca tcgccttcta tcgccttctt gacgagttct tctgagggga tcgatccgct  
 4201 gtaagtctgc agaaattgat gatctattaa acaataaaga tgtccactaa aatggaagt  
 4261 tttcctgtca tactttgtta agaaggggtga gaacagagta cctacatttt gaatggaagg  
 4321 attggagcta cgggggtggg ggtgggggtgg gattagataa atgcctgctc tttactgaag  
 4381 gctctttact attgctttat gataatgttt catagtggga tatcataatt taacaagca  
 4441 aaaccaaatt aagggccagc tcattcctcc cactcatgat ctatagatct atagatctct  
 4501 cgtgggatca ttgtttttct cttgattccc actttgtggg tctaagtact gtggtttcca  
 4561 aatgtgtcag tttcatagcc tgaagaacga gatcagcagc ctctgttcca catacacttc  
 4621 attctcagta ttgttttgcc aagttctaatt tccatcagaa gctgactcta gatcctgcag  
 4681 gaattcatat gaagttccta tactttctag agaataggaa ctctcggaata ggaacttcaa  
 4741 aatgtcgcgg cgcgccgaat agaacttctt gtcttccatg aacaatttat agccgccagc  
 4801 cccccagcac agtcagtaga tctggctgtg ctgggtgagca cctgtcaacc ttcacaaggg  
 4861 agggactcag ctaaggcaga gacagaaata aaactaagac ctacctata gagaaattta  
 4921 acatgaggat atgcaatgag aattgcacat agaacttatt tacttttagt tcttccctt  
 4981 cagattcatc cacactcggc ctccatccca tgtcaccact tacttgtcgc tctatggag  
 5041 aaagcagtga cctctccgag cccctccttt ctctacataa gcaatagact ttagcatgga  
 5101 gtcccacttt tcggttttct aatctctcac acaattctgt ttgttctctg agtctgggt  
 5161 accaccttgc ctgtccacat gtgctttggg tgatcaagca gatgtgacca ctgttgtcac  
 5221 tcataacaaa gccttccaaa ttcttccaga tggactgcta caaagatgtg aaaggcacca  
 5281 tctacgacta tgaggctctg tctcttaatg ggaaggaaca cattocattc aagcagtatg  
 5341 caggaaagca cgtcctcttt gtcaatgtgg ctacctattg cggctctgaca atccagtacc  
 5401 ctggtaagaa ttcagagcca tgtgacctca agaagaaatt ttttagctga ctatatttta  
 5461 aattacattg gatatcctat tccaattcca tatgtcatag taatttattt tcttctctga  
 5521 tgtcttaaat cagcaaagaa tggcccacat gccaaacctc gacagttttt gtcaaagggt  
 5581 ctattggagc acagcatata ctcacctgtg actgctttca cctoctaagg cagcggctag  
 5641 tagttgtgtg gacactagtg atagagagca tgtgatcagc aaaacctgaa acaccattca  
 5701 gctcttcacg gaagacactg gtccttcccc tggataggcc tgggtgtctg ttaagactg  
 5761 ccaactggaat caatatatgt gaatgaaatt tggtaataata tcaatgagtt aggaaattcc  
 5821 agaagtttcc ttggcaacta caggagagaa gatccatggt tctgagattt tccaggggca  
 5881 agataaaaaca gggaaagagg gccttgtacc tgggtgtagca tatgaccagc atagaagctg  
 5941 gtggagaggg tttctagttg tgtgaactaa taaagtcttc ttgtggatta ttatgggatg  
 6001 cagtgtgctt tgcagaagta atatatcac aaagatcaaa agccaatgga acaaaaggcc  
 6061 ggcctcgaca taacttcgta taatgtatgc tatacgaagt tataagctta agcgttagca  
 6121 cgtgttaact cgagtttaatt aatctttctg ctcttctgtc ccaaccctg agaaaactgt  
 6181 cacatttctg agagatgttc tttcttccca agccccgtt gttaacatcg tgagcactat  
 6241 ttgatgactt tgaataata atgtacattt gaagtcagcc caattcctcc tctcttttta  
 6301 gttgacgact aatctgtctt atcagtttat agagccttaa gaatgaatga tatcctggcg  
 6361 tggagatgtg tagctgtgat tcttattctc tgaacgctga ggaaggaagg gcatgagcct  
 6421 caggccaccc tgggctaaga ggatgacat atctcaaaga ggaagaaaa gcaatctcct  
 6481 tatttagttt acacttggtc tgtagcagat gagtaacca ggaagagttt ctacagggct  
 6541 gaaaggcagg ctctctaatt tcttctctct ctactggaaa gagtgggtgt ctggtaaaaa  
 6601 tgacagagtg gggaggaaga gtggaaagtg tgtggaaata tggaggcaat ctctaacttt

6661 aaaggggtct ttaagagagt ccaattgacc aagctggatc ctagtgtgat aggctcatat  
 6721 ttgtagagcc cagacagggg taacaaagga aataactgtg agagtctaag caaggcagtt  
 6781 gggacagttc atggcagtg gacaataggag cactgaagtt tgagcatcac ttcaactttg  
 6841 gggacttggt ttttttggtt tttgtttttt tttgtttttt tgtttttttt tccccagta  
 6901 gaatccattt tttatttccc caggaagttt agcttgaagc tcttggcttc tgctacctgc  
 6961 caaatgtgtc tgcatttgct cagtgtgaat tagcctgtac ccaggagaga accatgcgaa  
 7021 ttctatcagt tagtcaacaa ggagggctag ataatgagcg atagtattcc cagctggttt  
 7081 tgttttaaat actgtctggg ttttgagtga caacattggc tggcaccatc ttggaggaat  
 7141 ggatttgtaa atgggacctg agaatccctg tttgaaaaca aacaaacaaa caaacctaca  
 7201 tgtggttgtg agtttgagaa atggtgcaca gtaaaggggc tcagagtgca ggtctagcca  
 7261 cagtcaggtt gttcagattc tctgatctac agatggtttt cttcttctgg ttcttctct  
 7321 gtaaaatgac tagcccatag ggtcttctc tggtcagcct gggctatgta cattctcata  
 7381 tgttattgta gtagcaacag acctaagggg tcttctctgg atgggggtct ccagggtccg  
 7441 ccatcacctt gtccccttc taaccacaga gctgaatgca ctccaggagg atctgaagcc  
 7501 atttggcttg gttatattgg gctttccctg caaccaattt ggaaagcaag aaccaggaga  
 7561 caatttagag attcttctc ggtcaagta agtacctaca ctaaagctca gtaagagatc  
 7621 tcattgcctt ccctgtctca gagaccctc tgatcctccg cactgccagg gaggggtgtg  
 7681 attcacaggt ttgaggcact tgcaagcaga ttctaattga taagaatctg atgaggcctc  
 7741 ttcatgcctg acagccctgg agggatggat ggtggagaaa ttggagatca gctattcctg  
 7801 agacaagaac agttaaaggg gtggagacag actagaatca agaaaacgag gagaaccagg  
 7861 gagaccaaca cacaaagcaa gcccttggc tctccatgt caccaacccc tgctgcatct  
 7921 ctacctctt ctgccctacc tatctgcatc tcaccatcct aacttgtacc ctgtgtgcc  
 7981 aatcttggc ttgttgacag tatgttcgtc caggaaaagg gttttacct aactccagc  
 8041 tttttgcaaa aggggatgta aatgggtaaa acgagcagaa aatcttcacc ttctgaagg  
 8101 tgagtgaatg gctggagttt gcccaattcc tcccctccag acttctacc atcccttagg  
 8161 agcttaaaaa tatccatagg ttggttatgg ttgaaacaga cccaagggct cattcctaga  
 8221 tgttgggggt caatcttctt ggatgaaatc tgctcagcat agaaatgtga gctcatatgt  
 8281 catagagata tgagtctggt agcatccacg ggactctggc tttgggagga atagacagtg  
 8341 tgcaatggca gcttttacta gaccctgtgc tcattggcac tcgttccctc attcatccaa  
 8401 ggaacttttt gatgaatctc tgccacctgt atggtaggct acatagtaac aacacagaga  
 8461 actcagagct ttgcaactgc atgcatggct ctccaggaac tgctggaaaa gtgtgaggag  
 8521 ggcttcgtga gtcccatcca tctcatttta agatctgcct ttatttgaag gtcagggcc  
 8581 acatgtaagt tattcttaca gttctctttt taaaattaat ggacaaaatg tggcttagcc  
 8641 tttttcttct tcttctttg ataacaatcc tagtagctct aagttgttcc ccaaaaggtg  
 8701 tttttttgaa attccagcgg tctcagaac cctagacctt ggaaattaca ttctagtcca  
 8761 agtcattcac tatgcagaaa aggaaaatga gactgtgcag aggaattcat ctgtggcccc  
 8821 agcactggga ggtagagtca tgagtatcag gagttcaagg tcgtcttcag agacacattg  
 8881 actttgaggc cagcatgggc tatgtgagat cctatctcac aaacaaacaa tgacaaggac  
 8941 aagaaatgaa agcttgaag gcaataaata catcttaagc tatgtaatgt gaatgggatg  
 9001 gagccctggg gtgaaggaca gaaagaagga atgtgcttag gctgtgagat cagaaaaatc  
 9061 ttggcatctg gcatcacgat gaggagcagg gtttggggg tttagcagga accacaggag  
 9121 gatgggatgt atgggtgtca cagggagggg attgcctgtg aatgaggaca cctgggtca  
 9181 tctaaggaac agaaataatg tgtttctctc tctctgcttc tctgccgag cgttctgtgc  
 9241 ctccccctc agagactgtg gtcagtgcac aacatacctt ctgggagcca ataaaagtcc  
 9301 atgacatccg ctggaacttt gagaagttcc tggggggacc cgatggcatc cctgtcatgc  
 9361 gctggttcca ccaggctcct gtcagcactg tcaagtctga catcatggcg tacctgagcc  
 9421 atttcaaac catataggaa ggccaagctt ctgacctct cctccttccc ccttaaagac  
 9481 tgctctgaaa aaaagactcc atcttctcag cacactcttc actgaaatgg actctacctc  
 9541 cccaagtcac ccctaaattg cctaagttct tcccctgcac aagtagattt gtgtctggga  
 9601 agctgtagat gtttttctt gttagattta tgagttgaag agagaaaata aaagaaaaaa  
 9661 gaaaaagcta aatccagaga cctcagaggt ttggctgagt atgttagtac tcacctataa  
 9721 tgtcagcact cagcagacat tacagacatt tcagacaggc agcgacagga ggaacatgaa  
 9781 tggcaggcca gcctaagcta caagatatca tgtgtccaaa aaaaaaaaaa aaaaaatcca  
 9841 ccaccaccaa cacacccga ttgaactact ctaattcacc aaaggatatg gggatagctt  
 9901 ggttgaggc tgtatctgaa ggaagagtcc ccttggccat tctgagtctt tctcttccca  
 9961 gcctgaaggt ggagaaagag caatggaggc tggtcagaca atctagtttg ctctctgaa  
 10021 actgtgtgtc tctgagaca aatgcctgt cagttcctga ggtcttttaa ttccgtcttc  
 10081 atctctgtct ccatcctctc tgccctctc ctgcccga tctgaggag agtctgagca

10141 gattgactcg cacaggagga gggcatctcc ctgatgccag gatcggggac ttgtccctga  
 10201 ttctgcataa gtgctccttt ctgtgtgatc ttcacggggt cagctagtgc ttatgagtgg  
 10261 ggatgccttt catcatctga agaataggac cccccacata cacaccccaa cctgggattc  
 10321 ttcaacttca gaactagaca tattatttcc aataaaatgt tttctgaagc attcaagacc  
 10381 tttgtggttc attcctaatt gatgtttatg tttgaatctc tctctctgtc cacactataa  
 10441 gtgacatcca cattatgaac tttttcagag acagtgtatc agtcaaggct ctatagtac  
 10501 agaacttaag gaatgaatat ataatgtgta atacatgatt atgaaagaac tcagtgggga  
 10561 aacccccact cagctcccga ttcggcgtgc acccaagaat cacgaataga acacaacacc  
 10621 ttgatgtaac aacaagaggt attttaatgg cggagctccg ggtcgaaacg tatctcacac  
 10681 aacaggagac agtggattcg accacgaggc ttggaagcta ggggttttta tagaaaagga  
 10741 gtggggctgg gggaggaatt ggcgcgggtt cacatgattg gtccatttaa acatcagcag  
 10801 cctgtaacat ttaacttagg tcagaggggt gggagatagg gaggcaatgg gcctgccagg  
 10861 gcatgtcctg gtctgttctg ctatgttctc agccccaggt tcaaagctc acaacaact  
 10921 ctttgggcta tttgacatac attacatgaa ttacagtttt atttctttc aattacacac  
 10981 acacattaaa gggagtttgt tggaatgatg tatagtttgc agtccaacta atccaacaat  
 11041 ggccagctgt gactggaaag tccaagaatc tagtagttgc tcagtctgtg gaggctgggt  
 11101 gtttcagctg gtcttctaaa taagctagaa tctgaagaa gtaggctcca atagatgtac  
 11161 tggcaaagta agtacaagca ggcaaagaaa aaaccctttt ttcttccatt gtctcatgt  
 11221 aggcctccag cagaatgtat ggatcagatt gcctctagat ctggattaaa gacgtgtatc  
 11281 ttccagcctc aagatctggg tcaaaagctt gtcttcaagc ctcaagatct aggtcactgg  
 11341 tgtgccctcc atttctggat tgtagtttat tccaatgta gtcaagttga aaacatctca  
 11401 aacagtattt atcctcctag atgtttagaa agttgtcacc tgaggctcat ggctggcacc  
 11461 tggctttaag aattgcctca gaccaagttg gttgcatcag gtcttggcct caagggttta  
 11521 tctgaggcct ttcagctcca gaggcgtctg gggagtggc tgataccttt tgtccttgc  
 11581 ctgcagccca gtctttctct ctgataaaaa ccacttctct aacttgcgtg gtgttctagt  
 11641 gtcactcaag ttgagcatca aattcagaat gtatgtatta attggaacc caagcccagg  
 11701 tgttgacaat tactaatgt cctggtaaaa ttttttctt gaaatgtgag tgtcaactg  
 11761 gaacttgctc atgatggtag atcctgtagg cactgagtca cacaccccag taatccaata  
 11821 atgaaggtag attaaaatct ccatttcaca gtcttcattt taagaactcc aatgtgcaat  
 11881 tatcaacaca ggggggaaat gcctatctaa ggaagagatg ctaatgtgac tttttaaagg  
 11941 ctaaattatc cacacctagt taacaattag gaaataaatg tagcacaat agcttctgcc  
 12001 acaaagtatc tgtgattatt gaaactccc tccaatttga gtggtacagt ttaccatgaa  
 12061 gggagacacg ctagtaacat gttagcactg aaagcagtgg gtggtaatag aatggttatc  
 12121 attgcagaag gaagtctaca gtgtttaaac agttacgcta gggataacag ggtaatatag  
 12181 gtttgggcta gcttgcacat cggttttcga cattgattat tgactagtta ttaatagtaa  
 12241 tcaattacgg ggtcattagt tcatagccca tatatggagt tccgcgttac ataacttacg  
 12301 gtaaattggc cgcctggctg accgccaac gacccccgcc cattgacgtc aataatgacg  
 12361 tatgttccca tagtaacgcc aatagggact ttccattgac gtcaatgggt ggactattta  
 12421 cggtaaactg cccacttggc agtacatcaa gtgtatcata tgccaagtac gccccctatt  
 12481 gacgtcaatg acggtaaatg gccgcctgg cattatgccc agtacatgac cttatgggac  
 12541 tttcctactt ggcagtacat ctacgtatta gtcatcgcta ttaccatggg tcgaggtgag  
 12601 ccccagttc tgcttctact tccccatctc cccccctcc ccaccccaa ttttgtattt  
 12661 atttattttt taattatttt gtgcagcgat gggggcgggg gggggggggg cgcgcgccag  
 12721 gcggggcggg gcggggcgag gggcgggggc gggcgaggcg gagaggtgcg gcggcagcca  
 12781 atcagagcgg cgcgctccga aagtttctt ttatggcgag gcggcgggcg cggcgccct  
 12841 ataaaaagcg aagcgcgcgg cggcggggag tcgctgcgtt gccttcgccc cgtgccccgc  
 12901 tccgcgcgcg ctcgcgcgcg cgcggcgggc tctgactgac cgcgttactc ccacaggtga  
 12961 gcggggcgga cggcccttct cctccgggct gtaattagcg cttggtttaa tgacggctcg  
 13021 tttcttttct gtggctgcgt gaaagcctta aagggtccg ggagggccct ttgtgcgggg  
 13081 gggagcggct cggggggtgc gtgcgtgtgt gtgtgcgtgg ggagcgcgcg gtgcggccccg  
 13141 cgctgcccgg cggctgtgag cgctgcgggc gcggcgcggg gctttgtgcg ctccgcgtgt  
 13201 gcgcgagggg agcgcggccg gggcggtgc cccgcgtgc gggggggctg cgaggggaaac  
 13261 aaaggctgcg tgcggggtgt gtgcgtgggg gggtagcag ggggtgtggg cgcggcggtc  
 13321 gggctgtaac cccccctgc accccccctc ccgagttgct gagcacggcc cggcttcggg  
 13381 tgcggggctc cgtgcggggc gtggcgcggg gctcgcctg ccggggcggg ggtggcggca  
 13441 ggtgggggtg ccggcggggg cggggcgccc tcggggcggg gagggctcgg gggagggcg  
 13501 cggcgggccc ggagcgcggg cggctgtcga ggcgcggcga gccgcagcca ttgcctttta  
 13561 tggtaatcgt gcgagagggc gcagggactt ctttgtccc aaatctggcg gagccgaaat



13621 ctgggagggc cgcgccacc ccctctagcg ggcgcggggc aagcgggtagc gcgcccggcag  
 13681 gaaggaaatg ggcggggagg gccttcgtgc gtcgcgcgcgc cgcggtcccc ttctccatct  
 13741 ccagcctcgg ggctgccgca gggggacggc tgccttcggg ggggacgggg cagggcgggg  
 13801 ttcggcttct ggcgtgtgac cggcggctct agtaagcgtt ggggtgagta ctccctctca  
 13861 aaagcgggca tgacttctgc gctaagattg tcagtttcca aaaacgagga ggatttgata  
 13921 ttcacctggc ccgcgggtgat gcctttgagg gtggcgcgct ccatctggtc agaaaagaca  
 13981 atctttttgt tgtcaagctt gagggtggc aggcttgaga tctggccata cacttgagtg  
 14041 acattgacat ccactttgcc tttctctcca cagggtgtcca ctcccagggc ggccttagag  
 14101 cctctgctaa ccatgttcat gccttcttct ttttctaca gctagaacta gtggatccac  
 14161 cggctgccac catggcccag tccaagcacg gcctgaccac ggagatgacc atgaagtacc  
 14221 gcatggaggg ctgctgggac ggcacacaagt tctgtatcac cggcgaaggc atcggctacc  
 14281 ccttcaaggg caagcaggcc atcaacctgt gcgtggggga gggcggcccc ttgcccttcg  
 14341 ccgaggacat cttgtccgcc gccttcatgt acggcaaccg cgtgttcacc gactaccccc  
 14401 aggacatcgt cgactacttc aagaactcct gcccgcggc ctacacctgg gaccgctcct  
 14461 tcctgttcga ggacggcgcc gtgtgcatct gcaacgcgca catcacctgt agcgtggagg  
 14521 agaactgcat gtaccacgag tccaagttct acggcgtgaa ctccccgcc gacggccccg  
 14581 tgatgaagaa gatgaccgac aactgggagc cctcctgcga gaagatcatc cccgtgccca  
 14641 agcagggcat cttgaagggc gacgtgagca tgtacctgct gctgaaggac ggtggccgct  
 14701 tgcgctgcca gttcgacacc gtgtacaagg ccaagtccgt gcccgcgaag atgcccgact  
 14761 ggcacttcat ccagcacaag ctgaccgcg aggaccgcag cgacgccaag aaccagaagt  
 14821 ggcacctgac cgagcacgcc atcgcctccg gctccgctt gccctgagcg gccgaccggt  
 14881 tcgagatcca ggcgcggatc aataaaagat cattattttc aatagatctg tgtgtgggtt  
 14941 ttttgtgtgc cttgggggag ggggaggcca gaatgaggcg cggccaaggg ggagggggag  
 15001 gccagaatga ccttggggga gggggaggcc agaatgacct tgggggaggg ggagggccaga  
 15061 atgagggcgc gggcgaccgg ccgagctcca attcgcccta tagtgagtcg tattacaatt  
 15121 cactggccgt cgttttaca cgtcgtgact gggaaaacc tggcgttacc caacttaatc  
 15181 gccttgtagc acatccccct ttcgccagct ggcgtaatag cgaagaggcc cgcaccgatc  
 15241 gcccttccca acagttgagc agcctgaatg gcgaatggga cgcgcctgt agcggcgcat  
 15301 taagcgcggc ggggtgtggtg gttacgcgca gcgtgaccgc tacacttgcc agcgccttag  
 15361 cggccgctcc tttcgctttc ttccttccct ttctcgcac gttcgcggc tttccccgct  
 15421 aagctctaaa tcgggggctc cctttagggt tccgatttag tgctttacgg cacctcgacc  
 15481 ccaaaaaact tgattagggt gatggttccac gtagtgggccc atcgcctga tagacggttt  
 15541 ttcgcccttt gacgttggag tccacgttct ttaatagtgg actcctgttc caaactggaa  
 15601 caacactcaa ccctatctcg gtctattctt ttgatttata agggattttg ccgatttcgg  
 15661 cctattgggt aaaaaatgag ctgatttaac aaaaatttaa cgcgaatttt aacaaaatat  
 15721 taacgcttac aatttaggtg gcacttttcg gggaaatgtg cgcggaaccc ctatttggtt  
 15781 atttttctaa atacattcaa atatgtatcc gctcatgaga caataacct gataaatgct  
 15841 tcaataatat tgaaaaagga agagtatgag tattcaacat ttcggtgctg cccttattcc  
 15901 cttttttgag ccattttgcc ttcctgtttt tgctcaccga gaaacgctgg tgaaagtaaa  
 15961 agatgctgaa gatcagttgg gtgcacgagt gggttacatc gaactggatc tcaacagcgg  
 16021 taagatcctt gagagttttc gcccgaaga acgttttcca atgatgagca cttttaaagt  
 16081 tctgctatgt ggcgcggtat tatcccgtat tgacgcccgg caagagcaac tcggctcgccg  
 16141 catacactat tctcagaatg acttggttga gtactacca gtcacagaaa agcatcttac  
 16201 ggatggcatg acagtaagag aattatgagc tgctgccata accatgagtg ataactctgc  
 16261 ggccaactta cttctgacaa cgatcggagg accgaaggag ctaaccgctt ttttgacaaa  
 16321 catgggggat catgtaactc gccttgatcg ttgggaaccg gagctgaatg aagccatacc  
 16381 aaacgacgag cgtgacacca cgatgcctgt agcaatggca acaacgcttc gcaactatt  
 16441 aactggcgaa ctacttactc tagcttcccg gcaacaatta atagactgga tggaggcgga  
 16501 taaagttgca ggaccacttc tgcgctcggc ccttccggct ggctggttta ttgctgataa  
 16561 atctggagcc ggtgagcgtg ggtctcgcgg tatcattgca gcactggggc cagatggtaa  
 16621 gccctcccgt atcgtagtta tctacacgac ggggagtcag gcaactatgg atgaacgaaa  
 16681 tagacagatc gctgagatag gtgcctcact gattaagcat tggtaactgt cagaccaagt  
 16741 ttactcatat atacctttaga ttgattttaa acttcatttt taatttaaaa ggatctagggt  
 16801 gaagatcctt tttgataatc tcatgaccaa aatcccttaa cgtgagtttt cgttccactg  
 16861 agcgtcagac cccgtagaaa agatcaaagg atcttcttga gatccttttt ttctgcgctg  
 16921 aatctgctgc ttgcaaaaa aaaaaccacc gctaccagcg gtggtttgggt tgccggatca  
 16981 agagctacca actctttttc cgaaggtaac tggcttcagc agagcgcaga taccaaaatac  
 17041 tgtccttcta gtgtagccgt agttaggcca ccacttcaag aactctgtag caccgcctac

17101 atacctcgct ctgctaatacc tgttaccagt ggctgctgcc agtggcgata agtcgtgtct  
17161 taccgggttg gactcaagac gatagttacc ggataaggcg cagcggtcgg gctgaacggg  
17221 gggttcgtgc acacagccca gcttggagcg aacgacctac accgaactga gataacctaca  
17281 gcgtgagcta tgagaaagcg ccacgcttcc cgaagggaga aaggcggaca ggtatccgg  
17341 aagcggcagg gtcggaacag gagagcgcac gaggagctt ccaggggaa acgcctggta  
17401 tctttatagt cctgtcgggt ttcgccacct ctgacttgag cgtcgatttt tgtgatgctc  
17461 gtcagggggg cggagcctat ggaaaaacgc cagcaacgcg gcctttttac ggttcctggc  
17521 cttttgctgg cttttgctc acatgttctt tctgctgta tcccctgatt ctgtggataa  
17581 ccgattacc gcctttgagt gagctgatac cgctcgcgc agccgaacga ccgagcgcg  
17641 cgagtcagt agcgaggaag cggagagcg cccaatacgc aaaccgcctc tccccgcgcg  
17701 ttggccgatt cattaatgca gctggcacga caggtttccc gactggaaag cgggcagtga  
17761 gcgcaacgca attaagtga gttagctcac tcattaggca ccccaggctt tacactttat  
17821 gcttccggct cgtatgtgt gtggaattgt gagcggataa caatttcaca caggaaacag  
17881 ctatgacat gattacgcca agcgcgcaat taaccctcac taaagggaaac aaaagctgct  
17941 gagatctaga tatcgat

//

|     |         | motility     | progress    | velocity fast | med          | slow        | Velocity     |
|-----|---------|--------------|-------------|---------------|--------------|-------------|--------------|
| WT1 | Q1      | 29.00        | 2.00        | 12.00         | 17.00        | 9.00        | 38.00        |
|     | Q2      | 28.00        | 2.00        | 11.00         | 17.00        | 10.00       | 38.00        |
|     | moy WT1 | <b>28.50</b> | <b>2.00</b> | <b>11.50</b>  | <b>17.00</b> | <b>9.50</b> | <b>38.00</b> |
|     | ET WT1  | <b>0.71</b>  | <b>0.00</b> | <b>0.71</b>   | <b>0.00</b>  | <b>0.71</b> | <b>0.00</b>  |
| WT2 | Q1      | 64.00        | 8.00        | 31.00         | 33.00        | 9.00        | 73.00        |
|     | Q2      | 36.00        | 4.00        | 15.00         | 21.00        | 10.00       | 46.00        |
|     | moy WT2 | <b>50.00</b> | <b>6.00</b> | <b>23.00</b>  | <b>27.00</b> | <b>9.50</b> | <b>59.50</b> |
|     | ET WT2  | <b>19.80</b> | <b>2.83</b> | <b>11.31</b>  | <b>8.49</b>  | <b>0.71</b> | <b>19.09</b> |
| WT3 | Q1      | 60.00        | 7.00        | 31.00         | 28.00        | 11.00       | 70.00        |
|     | Q2      | 38.00        | 4.00        | 19.00         | 19.00        | 8.00        | 46.00        |
|     | moy WT3 | <b>49.00</b> | <b>5.50</b> | <b>25.00</b>  | <b>23.50</b> | <b>9.50</b> | <b>58.00</b> |
|     | ET WT3  | <b>15.56</b> | <b>2.12</b> | <b>8.49</b>   | <b>6.36</b>  | <b>2.12</b> | <b>16.97</b> |

|               | motility     | progress    | velocity fast | med          | slow        | Velocity     |
|---------------|--------------|-------------|---------------|--------------|-------------|--------------|
| <b>moy WT</b> | <b>42.50</b> | <b>4.50</b> | <b>19.83</b>  | <b>22.50</b> | <b>9.50</b> | <b>51.83</b> |
| <b>ET WT</b>  | <b>12.13</b> | <b>2.18</b> | <b>7.29</b>   | <b>5.07</b>  | <b>0.00</b> | <b>12.00</b> |
| <b>SEM</b>    | <b>7.01</b>  | <b>1.26</b> | <b>4.21</b>   | <b>2.93</b>  | <b>0.00</b> | <b>6.93</b>  |

|     |         | motilité     | progress    | vélocité rap | med          | slow         | Vélocité     |
|-----|---------|--------------|-------------|--------------|--------------|--------------|--------------|
| KO1 | Q1      | 38.00        | 3.00        | 16.00        | 21.00        | 13.00        | 50.00        |
|     | Q2      | 51.00        | 5.00        | 27.00        | 24.00        | 10.00        | 61.00        |
|     | moy KO1 | <b>44.50</b> | <b>4.00</b> | <b>21.50</b> | <b>22.50</b> | <b>11.50</b> | <b>55.50</b> |
|     | ET KO1  | <b>9.19</b>  | <b>1.41</b> | <b>7.78</b>  | <b>2.12</b>  | <b>2.12</b>  | <b>7.78</b>  |
| KO2 | Q1      | 51.00        | 1.00        | 34.00        | 16.00        | 5.00         | 55.00        |
|     | Q2      | 55.00        | 6.00        | 33.00        | 22.00        | 9.00         | 64.00        |
|     | moy KO2 | <b>53.00</b> | <b>3.50</b> | <b>33.50</b> | <b>19.00</b> | <b>7.00</b>  | <b>59.50</b> |
|     | ET KO2  | <b>2.83</b>  | <b>3.54</b> | <b>0.71</b>  | <b>4.24</b>  | <b>2.83</b>  | <b>6.36</b>  |
| KO3 | Q1      | 55.00        | 6.00        | 29.00        | 26.00        | 10.00        | 65.00        |
|     | Q2      | 42.00        | 3.00        | 16.00        | 26.00        | 13.00        | 55.00        |
|     | moy KO3 | <b>48.50</b> | <b>4.50</b> | <b>22.50</b> | <b>26.00</b> | <b>11.50</b> | <b>60.00</b> |
|     | ET KO3  | <b>9.19</b>  | <b>2.12</b> | <b>9.19</b>  | <b>0.00</b>  | <b>2.12</b>  | <b>7.07</b>  |

|               | motilité     | progress    | vélocité rap | med          | slow         | Vélocité     |
|---------------|--------------|-------------|--------------|--------------|--------------|--------------|
| <b>moy KO</b> | <b>48.67</b> | <b>4.00</b> | <b>25.83</b> | <b>22.50</b> | <b>10.00</b> | <b>58.33</b> |
| <b>ET KO</b>  | <b>4.25</b>  | <b>0.50</b> | <b>6.66</b>  | <b>3.50</b>  | <b>2.60</b>  | <b>2.47</b>  |
| <b>SEM</b>    | <b>2.46</b>  | <b>0.29</b> | <b>3.84</b>  | <b>2.02</b>  | <b>1.50</b>  | <b>1.42</b>  |

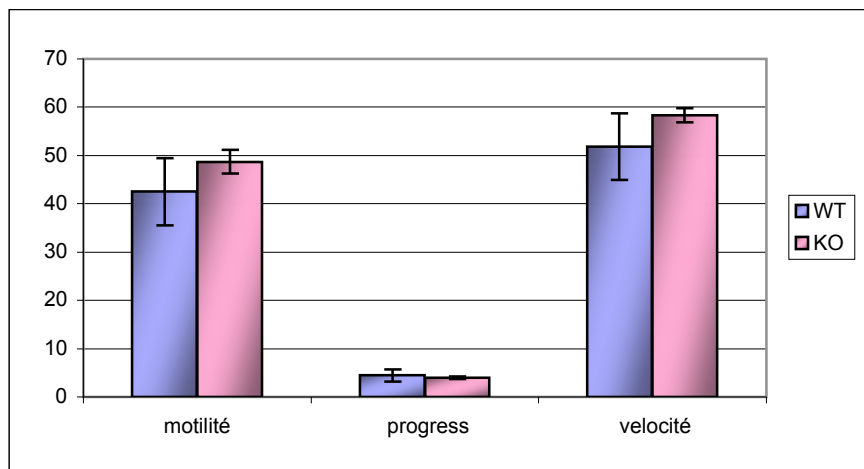

|     |         | VAP $\mu\text{m/s}$ | VSL $\mu\text{m/s}$ | ALH $\mu\text{m}$ |
|-----|---------|---------------------|---------------------|-------------------|
| WT1 | Q1      | 47.80               | 28.30               | 5.20              |
|     | Q2      | 44.90               | 26.70               | 5.30              |
|     | moy WT1 | <b>46.35</b>        | <b>27.50</b>        | <b>5.25</b>       |
|     | ET WT1  | <b>2.05</b>         | <b>1.13</b>         | <b>0.07</b>       |
| WT2 | Q1      | 62.90               | 40.50               | 6.90              |
|     | Q2      | 57.90               | 37.60               | 5.60              |
|     | moy WT2 | <b>60.40</b>        | <b>39.05</b>        | <b>6.25</b>       |
|     | ET WT2  | <b>3.54</b>         | <b>2.05</b>         | <b>0.92</b>       |
| WT3 | Q1      | 61.20               | 39.20               | 6.60              |
|     | Q2      | 56.90               | 31.90               | 4.40              |
|     | moy WT3 | <b>59.05</b>        | <b>35.55</b>        | <b>5.50</b>       |
|     | ET WT3  | <b>3.04</b>         | <b>5.16</b>         | <b>1.56</b>       |

|               | VAP $\mu\text{m/s}$ | VSL $\mu\text{m/s}$ | ALH $\mu\text{m}$ |                                                                 |
|---------------|---------------------|---------------------|-------------------|-----------------------------------------------------------------|
| <b>moy WT</b> | <b>55.27</b>        | <b>34.03</b>        | <b>5.67</b>       | VAP Path velocity<br>VSL Prog velocity<br>ALH Lateral Amplitude |
| <b>ET WT</b>  | <b>7.75</b>         | <b>5.92</b>         | <b>0.52</b>       |                                                                 |
| <b>SEM</b>    | <b>4.48</b>         | <b>3.42</b>         | <b>0.30</b>       |                                                                 |

|     |         | VAP $\mu\text{m/s}$ | VSL $\mu\text{m/s}$ | ALH $\mu\text{m}$ |
|-----|---------|---------------------|---------------------|-------------------|
| KO1 | Q1      | 64.40               | 40.10               | 7.70              |
|     | Q2      | 54.70               | 34.10               | 7.50              |
|     | moy KO1 | <b>59.55</b>        | <b>37.10</b>        | <b>7.60</b>       |
|     | ET KO1  | <b>6.86</b>         | <b>4.24</b>         | <b>0.14</b>       |
| KO2 | Q1      | 86.00               | 54.20               | 7.60              |
|     | Q2      | 67.60               | 40.60               | 6.10              |
|     | moy KO2 | <b>76.80</b>        | <b>47.40</b>        | <b>6.85</b>       |
|     | ET KO2  | <b>13.01</b>        | <b>9.62</b>         | <b>1.06</b>       |
| KO3 | Q1      | 45.30               | 27.10               | 6.10              |
|     | Q2      | 53.60               | 33.90               | 7.20              |
|     | moy KO3 | <b>49.45</b>        | <b>30.50</b>        | <b>6.65</b>       |
|     | ET KO3  | <b>5.87</b>         | <b>4.81</b>         | <b>0.78</b>       |

|               | VAP $\mu\text{m/s}$ | VSL $\mu\text{m/s}$ | ALH $\mu\text{m}$ |
|---------------|---------------------|---------------------|-------------------|
| <b>moy KO</b> | <b>61.93</b>        | <b>38.33</b>        | <b>7.03</b>       |
| <b>ET KO</b>  | <b>13.83</b>        | <b>8.52</b>         | <b>0.50</b>       |
| <b>SEM</b>    | <b>7.98</b>         | <b>4.92</b>         | <b>0.29</b>       |

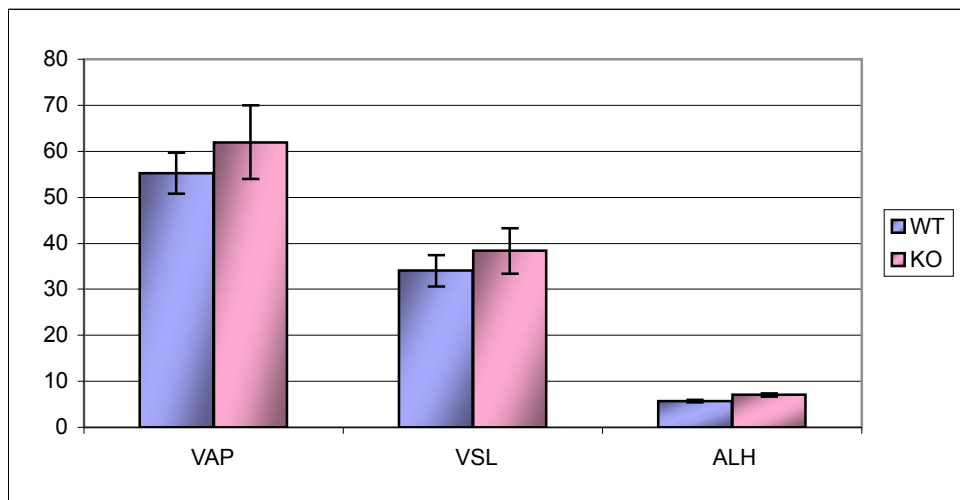

Supplement: JCI38940sd.pdf [file JCI38940sd.pdf]
